# Supplementary material
Source: Springer Nature journal article supplement (https://www.springermedizin.de/resource/supplementary/12876_2014_1170_MOESM1_ESM.pdf/9438232)
Supplement: MOESM1 [file 9438232]

**normal stools**

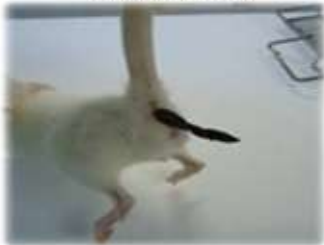

**wet stools**

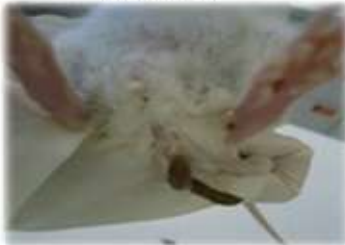

**pasty stools**

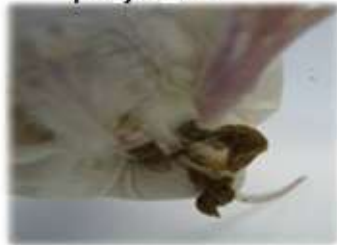

**semiliquid stools**

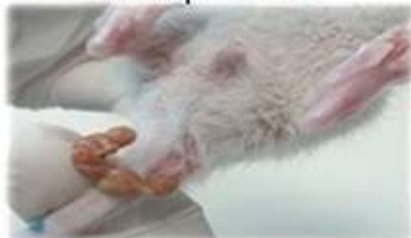

**watery diarrhea**

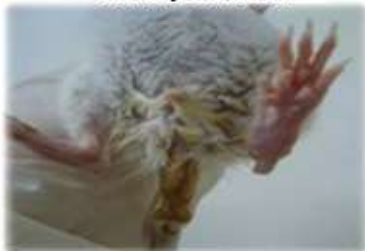

**Diarrhea scores**

|             |                        |
|-------------|------------------------|
| <b>+</b>    | <b>wet stools</b>      |
| <b>++</b>   | <b>pasty stools</b>    |
| <b>+++</b>  | <b>semiliquid</b>      |
| <b>++++</b> | <b>Watery diarrhea</b> |
